# Supplementary material for: Identification of Novel QTL for Seedling Root Architectural Traits in the D Genome of Natural and Resynthetic Allohexaploid Wheat
Source: MDPI journal article supplement (doi:10.3390/agronomy14030608), 2024-03-18
Supplement: s1 [file s1]

### *Supplementary Material*

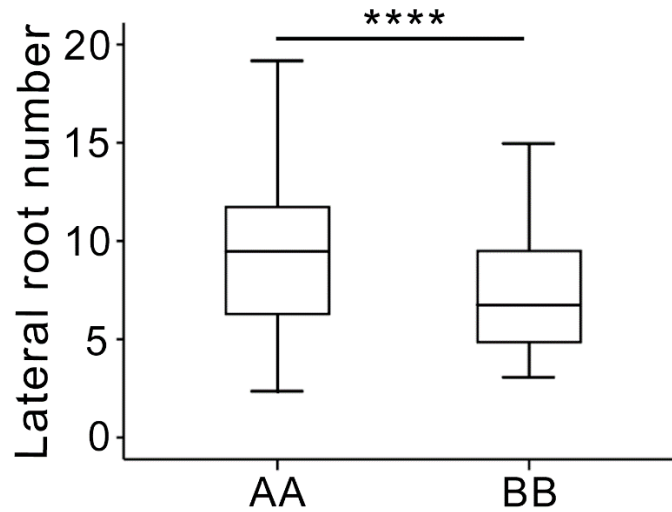

**Figure S1.** Difference in LRN between two alleles within the genetic interval flanking by the molecular markers *5D1204* and *5D122* in the TAA10/XX329 RIL population. AA represents lines with TAA10 genotype within the genetic interval flanking by the markers *5D1204* and *5D122*. BB indicates lines with XX329 genotype within the genetic interval flanking by the markers *5D1204* and *5D122*. Significant differences are indicated by \*\*\*\* ( $P < 0.0001$ ) (Student's  $t$  test).
