# Supplementary material for: Identification of Novel QTL for Seedling Root Architectural Traits in the D Genome of Natural and Resynthetic Allohexaploid Wheat
Source: MDPI journal article supplement (doi:10.3390/agronomy14030608), 2024-03-18
Supplement: s1 [file s1]

Archive with 2 entries (2 files):
- Supplementary_Figure.pdf
- Supplementary_Table.xlsx
