# Supplementary material for: Identification of Novel QTL for Seedling Root Architectural Traits in the D Genome of Natural and Resynthetic Allohexaploid Wheat
Source: MDPI journal article supplement (doi:10.3390/agronomy14030608), 2024-03-18
Supplement: s1 [file s1 › Supplementary_Table.xlsx]

## Sheet: Table S1
Table S1. Phenotypic data in the TAA10/XX329 recombinant inbred line (RIL) population
RIL	LRN	SRN	RHL	RD	TRV
TX1	8.00899	5.30556	1.05724	0.152935	0.039534
TX2	8.7797	5.09524	0.983021	0.151135	0.0355602
TX3	4.37144	5.19444	1.2434	0.154688	0.0393302
TX4	3.59412	5.30556	1.25803	0.153723	0.0401453
TX5	11.9673	5.19444	0.959821	0.149806	0.0368848
TX6	7.53933	5.5	0.947376	0.160075	0.0400435
TX7	5.73483	4.5	1.00758	0.161075	0.0334205
TX8	4.85176	5.30556	0.778923	0.157296	0.0338736
TX9	12.2712	5.5	0.98194	0.157804	0.0336929
TX10	12.1311	5.09524	1.08837	0.144638	0.0273699
TX11	14.9551	4.79881	0.819969	0.153895	0.0292668
TX12	14.4512	5.80952	0.848323	0.169303	0.0451566
TX13	3.12594	5.5	0.992295	0.152124	0.0242987
TX14	11.0266	5.5	0.878495	0.156694	0.0308024
TX15	8.04358	4.5	0.890777	0.161535	0.0285441
TX16	8.05424	5.33333	0.917481	0.151906	0.0340353
TX17	11.3898	5.30556	1.22651	0.146698	0.0346774
TX18	10.275	5.5	0.767504	0.143358	0.0414203
TX19	8.64713	5	0.972592	0.140467	0.0379953
TX20	4.7805	5.91667	1.09625	0.160015	0.0462366
TX21	14.3134	5.30556	0.976285	0.157777	0.0422765
TX22	8.85578	5.19444	0.881338	0.156133	0.0405556
TX23	5.43818	4.90476	0.997206	0.163844	0.0454444
TX24	11.3529	5.33333	1.19525	0.169433	0.0465556
TX25	9.93701	5.60714	0.777647	0.183978	0.0588889
TX26	9.85978	5.33333	0.726144	0.199178	0.0695556
TX27	3.99454	6	0.915532	0.188833	0.0503333
TX28	5.83091	4.79881	0.923129	0.182556	0.0494444
TX29	7.49652	5.30556	1.05834	0.171122	0.0423333
TX30	9.04456	5.09524	0.63111	0.168584	0.0499661
TX31	6.62226	5.33333	0.792252	0.174444	0.0505556
TX32	6.46587	5.33333	0.85673	0.183167	0.0595556
TX33	4.38955	5.30556	0.998772	0.172344	0.0544444
TX34	5.19778	5.33333	0.929473	0.188911	0.0606667
TX35	4.99433	5.19444	1.08235	0.1851	0.0541111
TX36	9.49207	5.91667	0.997016	0.172733	0.0533333
TX37	12.876	5.5	0.589482	0.167278	0.0623333
TX38	13.2554	5	0.537581	0.166767	0.0548889
TX39	5.33713	5.30556	0.975859	0.178967	0.0548889
TX40	9.1476	5.60714	0.741759	0.163089	0.0491111
TX41	13.1704	5.19444	1.31973	0.168644	0.0648889
TX42	6.76771	5.33333	0.771128	0.173789	0.0577778
TX43	4.48879	5.91667	1.21468	0.172831	0.0782383
TX44	14.3247	4.61111	0.916628	0.165068	0.0883282
TX45	11.5525	5.33333	1.27704	0.171417	0.0798924
TX46	9.18475	5.30556	1.32175	0.194774	0.100568
TX47	13.7327	5.66667	0.869174	0.16728	0.0694716
TX48	2.85441	5.30556	0.941527	0.182474	0.087005
TX49	10.8671	5.5	0.551097	0.152635	0.0704283
TX50	8.52575	6	1.01207	0.163845	0.0783617
TX51	8.5111	5.33333	0.890401	0.162193	0.0709141
TX52	8.0423	5.09524	1.26278	0.142723	0.057476
TX53	6.73515	5.5	1.08598	0.16165	0.0702664
TX54	5.43006	5.60714	1.19663	0.163535	0.074662
TX55	8.81713	4.79881	1.06434	0.168918	0.0674113
TX56	7.35106	4.38889	0.892355	0.179044	0.0602924
TX57	9.62417	5.09524	1.09001	0.16004	0.0624716
TX58	12.6816	5.09524	0.872522	0.15766	0.0684282
TX59	10.9197	5.30556	0.945484	0.175582	0.0754018
TX60	4.98134	5.60714	1.0352	0.167502	0.0674113
TX61	9.56653	5.66667	0.670944	0.180151	0.0771452
TX62	8.09398	5.66667	0.939594	0.196255	0.0665325
TX63	4.85387	5.60714	0.981883	0.181067	0.074966
TX64	8.95	5.60714	0.756698	0.160977	0.0642679
TX65	12.1741	4.79881	0.958205	0.199958	0.0601197
TX66	5.34815	4.40476	0.913569	0.146494	0.0421283
TX67	14.8651	5	0.79533	0.161632	0.0461289
TX68	6.94074	4.2222	0.810013	0.164386	0.041965
TX69	13.635	5.33333	0.862485	0.162748	0.0505376
TX70	10.2822	4.56667	0.866205	0.166594	0.0484149
TX71	11.4139	5.27778	0.932464	0.172079	0.0502111
TX72	10.3785	4.85714	0.920125	0.142179	0.0482274
TX73	9.60968	5.33333	0.936326	0.151923	0.0437973
TX74	8.20275	5.5	0.972862	0.153485	0.0442001
TX75	5.13686	4.90476	0.920521	0.151456	0.040072
TX76	4.96869	4.90476	0.983643	0.169228	0.0462137
TX77	13.1013	5	0.968861	0.167492	0.0412802
TX78	7.32426	5	0.892992	0.150371	0.0382597
TX79	17.7391	5.17857	0.807589	0.154201	0.0431932
TX80	13.6183	5.5	0.714137	0.161189	0.0489322
TX81	7.52654	5.60714	1.25263	0.172477	0.0665011
TX82	11.7696	4.74881	1.2166	0.157673	0.0495887
TX83	8.7244	4.85714	0.980719	0.17074	0.0567921
TX84	11.211	4.55556	1.06703	0.172214	0.0560613
TX85	10.56	4.5	1.42926	0.161477	0.0521986
TX86	4.07495	5.09524	1.34373	0.175926	0.0535558
TX87	4.2364	4.90476	1.04436	0.179193	0.0563745
TX88	3.77717	5.09524	0.940701	0.172607	0.0430528
TX89	11.7315	5.30556	0.911321	0.163472	0.0423353
TX90	9.39352	4.79881	0.825699	0.203086	0.0507212
TX91	10.7222	5.33333	1.40798	0.164859	0.0452055
TX92	8.8631	5	0.919503	0.165919	0.0433219
TX93	13.037	5.09524	1.22289	0.181636	0.0481654
TX94	5.20509	5.19444	0.591684	0.174871	0.042484
TX95	13.553	5.33333	0.872439	0.151224	0.04545
TX96	7.7409	5.5	1.00283	0.14914	0.0437053
TX97	7.27808	5	0.894956	0.193121	0.0432691
TX98	3.51311	5.33333	0.81655	0.178666	0.0434436
TX99	6.6685	5.33333	0.946918	0.185038	0.0457989
TX100	12.1723	5.30556	0.848331	0.165274	0.047282
TX101	9.47064	5	0.849332	0.1703	0.050554
TX102	13.8467	4.90476	0.697303	0.174621	0.0533952
TX103	11.727	5.33333	0.830136	0.183759	0.0619188
TX104	8.25869	5	0.85518	0.179889	0.0479087
TX105	4.11483	5.19444	0.805724	0.159988	0.0358581
TX106	11.3648	5.09524	0.837852	0.164625	0.0409526
TX107	9.94236	5.33333	0.918607	0.172105	0.0549984
TX108	8.79028	4.79881	0.69635	0.177999	0.0446934
TX109	6.53645	4.61111	0.694972	0.193537	0.0529142
TX110	3.16994	4.79881	0.561324	0.195383	0.0517564
TX111	3.56903	4.90476	1.04088	0.173789	0.0482828
TX112	9.8519	5.19444	0.936315	0.172543	0.0524511
TX113	8.74121	5	1.22988	0.184713	0.0552924
TX114	6.33988	5.60714	0.913082	0.181237	0.046296
TX115	6.12144	4.61111	0.920204	0.190775	0.0540794
TX116	3.78322	4.5	0.922476	0.172019	0.0429603
TX117	29.293	4.69444	0.994141	0.16929	0.0455885
TX118	6.58487	5.30556	1.07862	0.176598	0.053574
TX119	9.57396	4.79881	1.09559	0.172612	0.0419495
TX120	12.5201	4.90476	0.94826	0.167663	0.0605882
TX121	19.1717	5.5	1.29046	0.159441	0.0497945
TX122	9.84367	4.79881	1.30049	0.179793	0.0615956
TX123	6.29888	4.90476	0.938984	0.183297	0.0585734
TX124	9.95089	4.79881	1.27216	0.175959	0.060876
TX125	10.9808	5.09524	0.756897	0.171177	0.065913
TX126	6.22585	5.30556	0.989253	0.189708	0.0993013
TX127	2.5542	5	0.879356	0.150846	0.0651766
TX128	17.0812	5.09524	1.28521	0.142675	0.0647496
TX129	3.06648	4.90476	1.24321	0.141922	0.0510882
TX130	9.44918	5.09524	1.1386	0.139267	0.059342
TX131	2.35203	4.69444	1.24652	0.143769	0.0633266
TX132	13.6163	5.5	1.02933	0.159116	0.0668842
TX133	5.03575	5.33333	0.798298	0.16047	0.0745688
TX134	6.10623	5.33333	1.02293	0.185078	0.0679278
TX135	7.29624	5.19444	1.01908	0.173538	0.0495108
TX136	3.89073	4.79881	1.00112	0.185309	0.062905
TX137	4.99219	4.79881	0.889112	0.198423	0.0705588
TX138	4.50289	5.19444	0.988095	0.189222	0.0648185
TX139	5.84262	5.30556	0.941365	0.194762	0.0748641
TX140	6.44372	5	1.08639	0.159901	0.0421587
TX141	5.35373	5.33333	0.97025	0.165393	0.0429486
TX142	8.15082	5.60714	0.734054	0.160228	0.0412701
TX143	3.75082	5.33333	1.25466	0.17741	0.0455156
TX144	3.53923	5.5	0.919172	0.174884	0.0468978
TX145	3.56248	5.30556	0.958628	0.163266	0.0430473
TX146	7.33333	5.5	0.605196	0.183188	0.0414676
TX147	2.6929	5.30556	0.856042	0.183694	0.0520929
TX148	3.33377	5.30556	1.20368	0.16579	0.0461598
TX149	7.31279	5.5	0.821045	0.174334	0.0538729
TX150	10.2367	5.33333	0.942439	0.15393	0.040108
TX151	9.31765	5.60714	0.931412	0.18109	0.0611113
TX152	7.24706	5.30556	1.01314	0.188002	0.051381
TX153	10.1229	5	0.975308	0.173027	0.0490077
TX154	12.227	5	0.882778	0.165352	0.0371705
TX155	6.43333	5	0.984502	0.1589	0.0414416
TX156	5.83107	4.69444	1.0022	0.16372	0.0404027
TX157	5.3932	5.33333	1.00412	0.174174	0.0492913
TX158	21.0122	4.79881	0.882431	0.169695	0.057949
TX159	5.7845	4.69444	1.03144	0.182249	0.060604
TX160	36.96	5.30556	0.776926	0.156959	0.0498598
TX161	8.1415	5.30556	1.09498	0.153466	0.0489712
TX162	13.8612	5.09524	1.08235	0.129041	0.0342601
TX163	11.0509	5.30556	1.16702	0.156149	0.0541053
TX164	8.40604	5	0.981521	0.155427	0.0534142
TX165	9.41204	5.09524	1.15851	0.146157	0.0460093
TX166	6.61905	4.90476	1.10243	0.156179	0.0544015
TX167	7.18452	5.09524	1.01764	0.173814	0.0383155
TX168	8.72816	5.30556	0.830419	0.19053	0.0494599
TX169	9.25714	5.5	1.10197	0.167983	0.0420303
TX170	6.51989	5.09524	0.824274	0.183174	0.0473372
TX171	9.95991	5.33333	1.11357	0.192978	0.044896
TX172	14.9638	5.33333	1.03014	0.18627	0.055722
TX173	7.32735	5.60714	0.768559	0.18381	0.0486108
TX174	28.2087	5	1.0003	0.148261	0.0388534
TX175	4.52325	5.5	0.921637	0.165158	0.0435759
TX176	5.39832	5.30556	0.962862	0.151495	0.0459371
TX177	9.47048	5.19444	0.912714	0.15747	0.0503377
TX178	4.60291	5.30556	1.24367	0.149626	0.040356
TX179	13.7696	5.66667	0.903586	0.159887	0.0432539
TX180	4.9767	5.33333	0.915983	0.159529	0.0480837
TX181	4.69903	4.90476	1.13709	0.179094	0.0590715
TX182	12.8155	5.19444	0.897407	0.181486	0.0543095

## Sheet: Table S2
Table S2. Sequences of developed markers used in this study
Primer name	left primer	right primer	used for
Qau5D0720	TGCTTGACCTTGTGCATCTC	GCCGAAGGATTTGGTCAGTA	Fine mapping
Qau5D1204	CTCGCCATTTTTCTCCAC	TGTGTACGCTCAAGAGAACC
Qau5D123	GGAATGAGGGAATAAACACG	CATTGCTTCCCACATATGAA
Qau5D122	TGATTCTTGCTTGGTTGCTA	ACCACAGAGCACAGACCTTT
Qau5D630	ACGGTAGAATCGCCCCTACT	TGCCACCAACAAAAGTTGAA
Qau5D2-14	ACTGGGAAGGGCAAGAAGTT	CAGCACACAAACCCTTACCA
TraesCS5D02G288000	GCACATCCTTGGCTTCGTATC	CTTCAGGCGGAGCTCTTCAAG	RT-qPCR
TraesCS5D02G293100	GGACGTGTACAAGGTGGTGTC	GTTGAAGTCGAAGGCGAAGAAG
TaActin	TATGCCAGCGGTCGAACAAC	GGAACAGCACCTCAGGGCAC

## Sheet: Table S3 
Table S3. Statistical analysis for plant height (PH), spike length (SL), fertile spikelet number per spike (FSN), sterile spikelet number per spike (SSN), total spikelet number per spike (TSN), spike compactness (SC), grain length (GL), grain width (GW), thousand grain weight (TGW), tiller number per plant (TN) and grain yield per plant(GYP) between the two homozygous genotypes from NIL pairs L6.
Traits	AAa	BBb	P-value
PH (cm)	119.9±4.3	113.4±5.4	**
SL (cm)	10.9±0.6	10±0.7	**
FSN	18.9±1.2	18.4±1.0	NS
SSN	0.3±0.7	0.4±0.5	NS
SC	49.4±3.6	44.1±5.0	**
GL (mm)	6.61	6.71	NS
GW (mm)	3.31	3.26	NS
TGW (g)	36.6±3.04	35.9±4.81	NS
TN	11.9±2.5	9.6±1.3	**
GYP (g)	19.45±8.11	15.63±5.6	**
a AA represents TAA10 homozygote
b BB represents XX329 homozygote
** represent significant differences at P < 0.01.
“NS” indicates no significance (Student’s t test)

## Sheet: Table S4
Table S4. Annotated genes in the interval between the molecular markers 5D1204 and 5D122
Gene	Location	Description	Oryza sativa	Function_description_RICE	Arabidopsis thaliana	Function_description_TAIR	Pfam-IDs-(Description)	GO-IDs-(Description)-via-Interpro
TraesCS5D02G286000	chr5D:386512857-386514008(+)	Auxin-induced in root cultures protein 12 [UniProtKB/Swiss-Prot:Q94BT2]	Os09g0501100	Auxin-induced in root cultures protein 12	NA		PF04526:Protein of unknown function (DUF568);	GO:0009734 BP:auxin-activated signaling pathway;GO:0055114 BP:oxidation-reduction process;GO:0046872 MF:metal ion binding;GO:0005886 CC:plasma membrane;GO:0031225 CC:anchored component of membrane;
TraesCS5D02G286100	chr5D:386589437-386590714(+)	Auxin-induced in root cultures protein 12 [UniProtKB/Swiss-Prot:Q94BT2]	Os09g0501100	Auxin-induced in root cultures protein 12	NA		PF04526:Protein of unknown function (DUF568);	GO:0009734 BP:auxin-activated signaling pathway;GO:0055114 BP:oxidation-reduction process;GO:0046872 MF:metal ion binding;GO:0005886 CC:plasma membrane;GO:0031225 CC:anchored component of membrane;
TraesCS5D02G286200	chr5D:386645695-386647701(+)	60S ribosomal protein L32-1 [UniProtKB/Swiss-Prot:P49211]	Os09g0502000	60S ribosomal protein L32-1	AT4G18100	60S ribosomal protein L32-1 [UniProtKB/Swiss-Prot:P49211]	PF01655:Ribosomal protein L32;PF01655:Ribosomal protein L32;PF01655:Ribosomal protein L32;	GO:0006412 BP:translation;GO:0003735 MF:structural constituent of ribosome;GO:0005730 CC:nucleolus;GO:0005829 CC:cytosol;GO:0022625 CC:cytosolic large ribosomal subunit;GO:0022626 CC:cytosolic ribosome;GO:0042788 CC:polysomal ribosome;
TraesCS5D02G286300	chr5D:386651892-386654354(-)	Transcription factor bHLH49 [UniProtKB/Swiss-Prot:Q9CAA9]	Os09g0501600	Transcription factor Bhlh62	NA		PF00010:Helix-loop-helix DNA-binding domain;PF00010:Helix-loop-helix DNA-binding domain;	GO:0006355 BP:regulation of transcription, DNA-templated;GO:0040008 BP:regulation of growth;GO:0003677 MF:DNA binding;GO:0003700 MF:DNA-binding transcription factor activity;GO:0046983 MF:protein dimerization activity;GO:0005634 CC:nucleus;
TraesCS5D02G286400	chr5D:386686585-386688920(-)	60S ribosomal protein L32-1 [UniProtKB/Swiss-Prot:P49211]	Os09g0502000	Similar to Ribosomal L32	AT4G18100	60S ribosomal protein L32-1 [UniProtKB/Swiss-Prot:P49211]	PF01655:Ribosomal protein L32;	GO:0006412 BP:translation;GO:0003735 MF:structural constituent of ribosome;GO:0005730 CC:nucleolus;GO:0005829 CC:cytosol;GO:0022625 CC:cytosolic large ribosomal subunit;GO:0022626 CC:cytosolic ribosome;GO:0042788 CC:polysomal ribosome;
TraesCS5D02G286500	chr5D:386732844-386735285(-)	Peptidyl-prolyl cis-trans isomerase FKBP15-1 [UniProtKB/Swiss-Prot:Q38935]	Os09g0501850	Peptidyl-prolyl cis-trans isomerase FKBP15-1	AT3G25220	Peptidyl-prolyl cis-trans isomerase FKBP15-1 [UniProtKB/Swiss-Prot:Q38935]	PF00254:FKBP-type peptidyl-prolyl cis-trans isomerase;	GO:0003755 MF:peptidyl-prolyl cis-trans isomerase activity;GO:0005783 CC:endoplasmic reticulum;GO:0005788 CC:endoplasmic reticulum lumen;GO:0005829 CC:cytosol;GO:0099503 CC:secretory vesicle;
TraesCS5D02G286600	chr5D:386735730-386741942(-)	NA	Os09g0502100	Von Willebrand factor type A (VWA) domain containing protein LGD1	NA
TraesCS5D02G286700	chr5D:386859645-386866718(-)	E3 ubiquitin ligase BIG BROTHER-related [UniProtKB/Swiss-Prot:Q9LT17]	Os09g0535100	E3 ubiquitin ligase BIG BROTHER-related	AT3G19910	E3 ubiquitin ligase BIG BROTHER-related [UniProtKB/Swiss-Prot:Q9LT17]	PF17123:RING-like zinc finger;	GO:0016567 BP:protein ubiquitination;GO:0051865 BP:protein autoubiquitination;GO:0004842 MF:ubiquitin-protein transferase activity;GO:0046872 MF:metal ion binding;
TraesCS5D02G286800	chr5D:386945745-386947550(-)	NA	Os09g0480300	transposon protein	NA		PF04434:SWIM zinc finger;
TraesCS5D02G286900	chr5D:386958437-386959557(+)	NA	NA		NA
TraesCS5D02G287000	chr5D:386983211-386985089(+)	Short-chain dehydrogenase TIC 32 B, chloroplastic [UniProtKB/Swiss-Prot:A0A078ISJ6]	Os01g0151700	Short-chain dehydrogenase TIC 32 B, chloroplastic	AT5G02540	Short-chain dehydrogenase TIC 32 B, chloroplastic [UniProtKB/Swiss-Prot:A0A078ISJ6]	PF00106:short chain dehydrogenase;	GO:0015031 BP:protein transport;GO:0005516 MF:calmodulin binding;GO:0016491 MF:oxidoreductase activity;GO:0009706 CC:chloroplast inner membrane;
TraesCS5D02G287100	chr5D:387089092-387093196(+)	NA	NA		NA
TraesCS5D02G287200	chr5D:387091939-387092664(-)	NA	NA		NA
TraesCS5D02G287300	chr5D:387097869-387099335(+)	Chloroplast envelope quinone oxidoreductase homolog [UniProtKB/Swiss-Prot:Q9SV68]	Os09g0502500	Chloroplast envelope quinone oxidoreductase homolog	AT4G13010	Chloroplast envelope quinone oxidoreductase homolog [UniProtKB/Swiss-Prot:Q9SV68]	PF08240:Alcohol dehydrogenase GroES-like domain;PF13602:Zinc-binding dehydrogenase;PF08240:Alcohol dehydrogenase GroES-like domain;PF13602:Zinc-binding dehydrogenase;	GO:0016491 MF:oxidoreductase activity;GO:0005773 CC:vacuole;GO:0005829 CC:cytosol;GO:0005886 CC:plasma membrane;GO:0009507 CC:chloroplast;GO:0009535 CC:chloroplast thylakoid membrane;GO:0009706 CC:chloroplast inner membrane;GO:0009941 CC:chloroplast envelope;
TraesCS5D02G287400	chr5D:387116213-387117796(-)	NA	Os09g0502800	OsFBX334 - F-box domain containing protein	NA
TraesCS5D02G287500	chr5D:387193773-387196879(-)	NA	Os09g0502800	OsFBX334 - F-box domain containing protein	NA		PF00646:F-box domain;
TraesCS5D02G287600	chr5D:387242779-387243354(+)	NA	NA		NA
TraesCS5D02G287700	chr5D:387250089-387252054(+)	Chloroplast envelope quinone oxidoreductase homolog [UniProtKB/Swiss-Prot:Q9SV68]	Os09g0503100	Chloroplast envelope quinone oxidoreductase homolog	AT4G13010	Chloroplast envelope quinone oxidoreductase homolog [UniProtKB/Swiss-Prot:Q9SV68]	PF08240:Alcohol dehydrogenase GroES-like domain;PF13602:Zinc-binding dehydrogenase;	GO:0016491 MF:oxidoreductase activity;GO:0005773 CC:vacuole;GO:0005829 CC:cytosol;GO:0005886 CC:plasma membrane;GO:0009507 CC:chloroplast;GO:0009535 CC:chloroplast thylakoid membrane;GO:0009706 CC:chloroplast inner membrane;GO:0009941 CC:chloroplast envelope;
TraesCS5D02G287800	chr5D:387296547-387300998(+)	Fasciclin-like arabinogalactan protein 2 [UniProtKB/Swiss-Prot:Q9SU13]	Os09g0476800	Fasciclin-like arabinogalactan protein 1	NA		PF02469:Fasciclin domain;PF02469:Fasciclin domain;PF02469:Fasciclin domain;	GO:0005774 CC:vacuolar membrane;GO:0005829 CC:cytosol;GO:0005886 CC:plasma membrane;GO:0031225 CC:anchored component of membrane;GO:0046658 CC:anchored component of plasma membrane;
TraesCS5D02G287900	chr5D:387320211-387324601(-)	NA	Os09g0502800		NA		PF00646:F-box domain;
TraesCS5D02G288000	chr5D:387619840-387626150(-)	Transport inhibitor response 1-like protein Os11g0515500 [UniProtKB/Swiss-Prot:Q2R3K5]	Os11g0515500	Transport inhibitor response 1-like protein	AT3G26810	Protein AUXIN SIGNALING F-BOX 2 [UniProtKB/Swiss-Prot:Q9LW29]	PF18511:F-box;PF18791:Transport inhibitor response 1 protein domain;	GO:0009734 BP:auxin-activated signaling pathway;GO:0016567 BP:protein ubiquitination;GO:0000822 MF:inositol hexakisphosphate binding;GO:0010011 MF:auxin binding;GO:0005634 CC:nucleus;GO:0019005 CC:SCF ubiquitin ligase complex;
TraesCS5D02G288100	chr5D:387626001-387629441(+)	NA	Os11g0516100		AT5G55125	Ribosomal protein L31
TraesCS5D02G288200	chr5D:387630140-387630829(-)	NA	Os09g0502600		NA
TraesCS5D02G288300	chr5D:387681555-387684455(-)	NA	Os09g0503700		NA
TraesCS5D02G288400	chr5D:387692005-387693539(-)	NA	Os09g0502800	OsFBX334 - F-box domain containing protein	NA		PF08387:FBD;
TraesCS5D02G288500	chr5D:387705050-387706036(-)	NA	Os09g0502600		NA		PF08387:FBD;
TraesCS5D02G288600	chr5D:387711601-387712676(-)	NA	Os09g0502600		NA		PF08387:FBD;
TraesCS5D02G288700	chr5D:387727479-387729377(-)	UDP-glucuronate 4-epimerase 6 [UniProtKB/Swiss-Prot:Q9LIS3]	Os09g0504000	UDP-glucuronate 4-epimerase 6	AT3G23820	UDP-glucuronate 4-epimerase 6 [UniProtKB/Swiss-Prot:Q9LIS3]	PF01370:NAD dependent epimerase/dehydratase family;	GO:0033481 BP:galacturonate biosynthetic process;GO:0050829 BP:defense response to Gram-negative bacterium;GO:0050832 BP:defense response to fungus;GO:0050378 MF:UDP-glucuronate 4-epimerase activity;GO:0000138 CC:Golgi trans cisterna;GO:0005768 CC:endosome;GO:0005794 CC:Golgi apparatus;GO:0005802 CC:trans-Golgi network;GO:0016021 CC:integral component of membrane;GO:0032580 CC:Golgi cisterna memb…
TraesCS5D02G288800	chr5D:387917227-387919135(-)	Acetylserotonin O-methyltransferase 1 [UniProtKB/Swiss-Prot:Q6EPG8]	Os06g0281300	Acetylserotonin O-methyltransferase 1	NA		PF00891:O-methyltransferase domain;PF08100:Dimerisation domain;	GO:0019438 BP:aromatic compound biosynthetic process;GO:0030187 BP:melatonin biosynthetic process;GO:0032259 BP:methylation;GO:0008171 MF:O-methyltransferase activity;GO:0008757 MF:S-adenosylmethionine-dependent methyltransferase activity;GO:0017096 MF:acetylserotonin O-methyltransferase activity;GO:0046983 MF:protein dimerization activity;GO:0005737 CC:cytoplasm;
TraesCS5D02G288900	chr5D:387960841-387961047(+)	Subtilisin-chymotrypsin inhibitor-2A [UniProtKB/Swiss-Prot:P01053]	Os12g0437800	Subtilisin-chymotrypsin inhibitor-2A	NA		PF00280:Potato inhibitor I family;	GO:0009611 BP:response to wounding;GO:0004867 MF:serine-type endopeptidase inhibitor activity;
TraesCS5D02G289000	chr5D:387989373-387989660(+)	Subtilisin-chymotrypsin inhibitor-2A [UniProtKB/Swiss-Prot:P01053]	Os12g0437800	Subtilisin-chymotrypsin inhibitor-2A	NA		PF00280:Potato inhibitor I family;	GO:0009611 BP:response to wounding;GO:0004867 MF:serine-type endopeptidase inhibitor activity;
TraesCS5D02G289100	chr5D:387994646-387996581(+)	NA	NA		NA
TraesCS5D02G289200	chr5D:388043856-388044149(+)	Subtilisin-chymotrypsin inhibitor-2A [UniProtKB/Swiss-Prot:P01053]	Os12g0437800	Subtilisin-chymotrypsin inhibitor-2A	NA		PF00280:Potato inhibitor I family;	GO:0009611 BP:response to wounding;GO:0004867 MF:serine-type endopeptidase inhibitor activity;
TraesCS5D02G289300	chr5D:388097016-388101303(+)	Cyclin-C1-1	Os09g0504400	Cyclin-C1-1	AT5G48640	Cyclin-C1-1 [UniProtKB/Swiss-Prot:Q9FJK6]	PF00134:"Cyclin, N-terminal domain";PF00134:"Cyclin, N-terminal domain";PF00134:"Cyclin, N-terminal domain";PF00134:"Cyclin, N-terminal domain";	GO:0006357 BP:regulation of transcription by RNA polymerase II;GO:0007049 BP:cell cycle;GO:0045944 BP:positive regulation of transcription by RNA polymerase II;GO:0051301 BP:cell division;GO:0016538 MF:cyclin-dependent protein serine/threonine kinase regulator activity;GO:0005634 CC:nucleus;GO:0016592 CC:mediator complex;GO:0042025 CC:host cell nucleus;
TraesCS5D02G289400	chr5D:388100580-388104112(-)	NA	Os09g0504700	Zinc finger, RING/FYVE/PHD-type domain containing protein	NA		PF13923:"Zinc finger, C3HC4 type (RING finger)";PF13923:"Zinc finger, C3HC4 type (RING finger)";
TraesCS5D02G289500	chr5D:388104261-388107376(+)	NA	Os09g0504800		NA		PF12928:tRNA-splicing endonuclease subunit sen54 N-term;PF12928:tRNA-splicing endonuclease subunit sen54 N-term;
TraesCS5D02G289600	chr5D:388109795-388110313(+)	Putative ripening-related protein 6 [UniProtKB/Swiss-Prot:Q7XD66]	NA		NA			GO:0005576 CC:extracellular region;
TraesCS5D02G289800	chr5D:388331331-388332925(+)	Protein SRG1	Os09g0451000	1-aminocyclopropane-1-carboxylate oxidase 1	NA		PF03171:2OG-Fe(II) oxygenase superfamily;PF14226:non-haem dioxygenase in morphine synthesis N-terminal;	GO:0010150 BP:leaf senescence;GO:0016682 MF:oxidoreductase activity, acting on diphenols and related substances as donors, oxygen as acceptor;GO:0046872 MF:metal ion binding;GO:0051213 MF:dioxygenase activity;
TraesCS5D02G289900	chr5D:388336423-388337880(-)	NA	NA		NA
TraesCS5D02G290000	chr5D:388346619-388347224(-)	NA	NA		NA
TraesCS5D02G290100	chr5D:388380701-388382012(+)	NA	NA		NA
TraesCS5D02G290200	chr5D:388394266-388394830(-)	Serine/threonine protein phosphatase 2A 59 kDa regulatory subunit B' eta isoform [UniProtKB/Swiss-Prot:Q9LU89]	Os09g0542700	Serine/threonine protein phosphatase 2A 57 kDa regulatory subunit B' alpha isoform	AT4G15415	Serine/threonine protein phosphatase 2A 59 kDa regulatory subunit B' gamma isoform [UniProtKB/Swiss-Prot:Q8RW96]	PF01603:Protein phosphatase 2A regulatory B subunit (B56 family);	GO:0006470 BP:protein dephosphorylation;GO:0006952 BP:defense response;GO:0009742 BP:brassinosteroid mediated signaling pathway;GO:0031952 BP:regulation of protein autophosphorylation;GO:0072542 MF:protein phosphatase activator activity;GO:0000159 CC:protein phosphatase type 2A complex;GO:0005634 CC:nucleus;GO:0005730 CC:nucleolus;GO:0005737 CC:cytoplasm;GO:0005829 CC:cytosol;
TraesCS5D02G290300	chr5D:388411823-388412878(+)	NA	NA		NA
TraesCS5D02G290400	chr5D:388422212-388423508(-)	Protein SRG1	Os09g0451000	1-aminocyclopropane-1-carboxylate oxidase 1	NA		PF03171:2OG-Fe(II) oxygenase superfamily;PF14226:non-haem dioxygenase in morphine synthesis N-terminal;	GO:0010150 BP:leaf senescence;GO:0016682 MF:oxidoreductase activity, acting on diphenols and related substances as donors, oxygen as acceptor;GO:0046872 MF:metal ion binding;GO:0051213 MF:dioxygenase activity;
TraesCS5D02G290500	chr5D:388426282-388430439(+)	NA	Os09g0504800		NA		PF12928:tRNA-splicing endonuclease subunit sen54 N-term;
TraesCS5D02G290600	chr5D:388589057-388590639(+)	Protein SRG1	Os09g0451000	1-aminocyclopropane-1-carboxylate oxidase 1	NA		PF03171:2OG-Fe(II) oxygenase superfamily;PF14226:non-haem dioxygenase in morphine synthesis N-terminal;	GO:0010150 BP:leaf senescence;GO:0016682 MF:oxidoreductase activity, acting on diphenols and related substances as donors, oxygen as acceptor;GO:0046872 MF:metal ion binding;GO:0051213 MF:dioxygenase activity;
TraesCS5D02G290700	chr5D:388593566-388594761(+)	NA	NA		NA
TraesCS5D02G290800	chr5D:388596308-388599876(-)	NA	Os09g0504900		NA		PF14780:Domain of unknown function (DUF4477);
TraesCS5D02G290900	chr5D:388772876-388776157(+)	Alpha carbonic anhydrase 1, chloroplastic [UniProtKB/Swiss-Prot:O04846]	Os09g0454500	Alpha carbonic anhydrase 2	NA		PF00194:Eukaryotic-type carbonic anhydrase;	GO:0006730 BP:one-carbon metabolic process;GO:0004089 MF:carbonate dehydratase activity;GO:0008270 MF:zinc ion binding;GO:0016836 MF:hydro-lyase activity;GO:0005783 CC:endoplasmic reticulum;GO:0009570 CC:chloroplast stroma;
TraesCS5D02G291000	chr5D:388794132-388794734(-)	NA	Os09g0505000	Zinc finger, RING/FYVE/PHD-type domain containing protein	NA		PF13920:"Zinc finger, C3HC4 type (RING finger)";
TraesCS5D02G291100	chr5D:388829918-388831198(-)	NA	NA		NA		PF14368:Probable lipid transfer;
TraesCS5D02G291200	chr5D:388871458-388873349(-)	Putative UDP-rhamnose:rhamnosyltransferase 1 [UniProtKB/Swiss-Prot:Q66PF2]	Os09g0518200	UDP-glucosyltransferase UGT13248	NA		PF00201:UDP-glucoronosyl and UDP-glucosyl transferase;	GO:0008194 MF:UDP-glycosyltransferase activity;GO:0016021 CC:integral component of membrane;
TraesCS5D02G291300	chr5D:389030291-389030946(-)	LOB domain-containing protein 24 [UniProtKB/Swiss-Prot:P59468]	NA		AT3G26660	LOB domain-containing protein 24 [UniProtKB/Swiss-Prot:P59468]	PF03195:Lateral organ boundaries (LOB) domain;
TraesCS5D02G291400	chr5D:389035145-389036350(-)	NA	NA		NA
TraesCS5D02G291500	chr5D:389109222-389114078(-)	Ubiquitin carboxyl-terminal hydrolase 2 [UniProtKB/Swiss-Prot:Q8W4N3]	Os09g0505100	Ubiquitin carboxyl-terminal hydrolase 1	NA		PF00443:Ubiquitin carboxyl-terminal hydrolase;PF02148:Zn-finger in ubiquitin-hydrolases and other protein;PF00443:Ubiquitin carboxyl-terminal hydrolase;PF02148:Zn-finger in ubiquitin-hydrolases and other protein;	GO:0006511 BP:ubiquitin-dependent protein catabolic process;GO:0016579 BP:protein deubiquitination;GO:0004197 MF:cysteine-type endopeptidase activity;GO:0004843 MF:thiol-dependent ubiquitin-specific protease activity;GO:0008270 MF:zinc ion binding;GO:0000502 CC:proteasome complex;GO:0005634 CC:nucleus;GO:0005829 CC:cytosol;
TraesCS5D02G291600	chr5D:389439066-389441326(+)	FHA domain-containing protein FHA2 [UniProtKB/Swiss-Prot:Q9SFV2]	Os09g0505200	Transcriptional activator FHA1 [UniProtKB/Swiss-Prot:Q945P0]	NA		PF00498:FHA domain;	GO:0048638 BP:regulation of developmental growth;GO:0080086 BP:stamen filament development;GO:0005634 CC:nucleus;
TraesCS5D02G291700	chr5D:389444018-389447462(-)	Oleoyl-acyl carrier protein thioesterase 1, chloroplastic [UniProtKB/Swiss-Prot:Q42561]	Os09g0505300	Oleoyl-acyl carrier protein thioesterase 1, chloroplastic	AT3G25110	Oleoyl-acyl carrier protein thioesterase 1, chloroplastic [UniProtKB/Swiss-Prot:Q42561]	PF01643:Acyl-ACP thioesterase;PF01643:Acyl-ACP thioesterase;	GO:0006633 BP:fatty acid biosynthetic process;GO:0000036 MF:acyl carrier activity;GO:0004320 MF:oleoyl-[acyl-carrier-protein] hydrolase activity;GO:0016295 MF:myristoyl-[acyl-carrier-protein] hydrolase activity;GO:0016296 MF:palmitoyl-[acyl-carrier-protein] hydrolase activity;GO:0016297 MF:acyl-[acyl-carrier-protein] hydrolase activity;GO:0009507 CC:chloroplast;
TraesCS5D02G291800	chr5D:389457730-389461666(-)	Probable auxin efflux carrier component 5b [UniProtKB/Swiss-Prot:D5A7J3]	Os08g0529000	Probable auxin efflux carrier component 5c	AT5G16530	Auxin efflux carrier component 5 [UniProtKB/Swiss-Prot:Q9FFD0]	PF03547:embrane transport protein;PF03547:embrane transport protein;	GO:0009734 BP:auxin-activated signaling pathway;GO:0009926 BP:auxin polar transport;GO:0010252 BP:auxin homeostasis;GO:0010315 BP:auxin efflux;GO:0010329 MF:auxin efflux transmembrane transporter activity;GO:0005783 CC:endoplasmic reticulum;GO:0005886 CC:plasma membrane;GO:0016021 CC:integral component of membrane;
TraesCS5D02G291900	chr5D:389494983-389495832(+)	NA	NA		NA
TraesCS5D02G292000	chr5D:389523975-389527033(-)	Beta-ureidopropionase [UniProtKB/Swiss-Prot:Q8H183]	Os07g0485100	Beta-ureidopropionase	AT5G64370	Beta-ureidopropionase [UniProtKB/Swiss-Prot:Q8H183]	PF00795:Carbon-nitrogen hydrolase;	GO:0006212 BP:uracil catabolic process;GO:0019482 BP:beta-alanine metabolic process;GO:0033396 BP:beta-alanine biosynthetic process via 3-ureidopropionate;GO:0043562 BP:cellular response to nitrogen levels;GO:0003837 MF:beta-ureidopropionase activity;GO:0016811 MF:hydrolase activity, acting on carbon-nitrogen (but not peptide) bonds, in linear amides;GO:0005829 CC:cytosol;
TraesCS5D02G292100	chr5D:389587855-389594643(+)	Nucleolar protein 14 [UniProtKB/Swiss-Prot:P78316]	Os03g0598200	Nucleolar protein 14	NA		PF04147:Nop14-like family ;PF04147:Nop14-like family ;	GO:0000447 BP:endonucleolytic cleavage in ITS1 to separate SSU-rRNA from 5.8S rRNA and LSU-rRNA from tricistronic rRNA transcript (SSU-rRNA, 5.8S rRNA, LSU-rRNA);GO:0000462 BP:maturation of SSU-rRNA from tricistronic rRNA transcript (SSU-rRNA, 5.8S rRNA, LSU-rRNA);GO:0000472 BP:endonucleolytic cleavage to generate mature 5'-end of SSU-rRNA from (SSU-rRNA, 5.8S rRNA, LSU-rRNA);GO:0000480 BP:endonu…
TraesCS5D02G292200	chr5D:389595852-389598251(-)	ACT domain-containing protein ACR4 [UniProtKB/Swiss-Prot:Q8LJW3]	Os08g0533600	ACT domain-containing protein ACR4	AT1G69040	ACT domain-containing protein ACR4 [UniProtKB/Swiss-Prot:Q8LJW3]	PF01842:ACT domain;PF01842:ACT domain;	GO:0009506 CC:plasmodesma;
TraesCS5D02G292300	chr5D:389697423-389698334(+)	NA	NA		NA
TraesCS5D02G292400	chr5D:390013026-390014316(+)	Putative F-box/LRR-repeat protein 23 [UniProtKB/Swiss-Prot:Q9S9V9]	NA		NA		PF12937:F-box-like;
TraesCS5D02G292500	chr5D:390019293-390022853(+)	Receptor kinase-like protein Xa21 [UniProtKB/Swiss-Prot:Q2R2D5]	Os09g0479200	LRR receptor-like serine/threonine-protein kinase	NA		PF00069:Protein kinase domain;PF00560:Leucine Rich Repeat;PF08263:Leucine rich repeat N-terminal domain;PF13855:Leucine rich repeat;PF13855:Leucine rich repeat;	GO:0006952 BP:defense response;GO:0004674 MF:protein serine/threonine kinase activity;GO:0005524 MF:ATP binding;GO:0005634 CC:nucleus;GO:0005789 CC:endoplasmic reticulum membrane;GO:0005886 CC:plasma membrane;GO:0016021 CC:integral component of membrane;GO:0032541 CC:cortical endoplasmic reticulum;GO:1990578 CC:perinuclear endoplasmic reticulum membrane;
TraesCS5D02G292600	chr5D:390256466-390258955(+)	NA	NA		NA		PF00646:F-box domain;
TraesCS5D02G292700	chr5D:390263999-390269678(-)	Uridine kinase-like protein 2, chloroplastic [UniProtKB/Swiss-Prot:Q9LK34]	Os09g0505800	Uridine kinase-like protein 2, chloroplastic	AT3G27190	Uridine kinase-like protein 2, chloroplastic [UniProtKB/Swiss-Prot:Q9LK34]	PF00485:Phosphoribulokinase / Uridine kinase family;PF14681:Uracil phosphoribosyltransferase;PF00485:Phosphoribulokinase / Uridine kinase family;PF14681:Uracil phosphoribosyltransferase;	GO:0006207 BP:'de novo' pyrimidine nucleobase biosynthetic process;GO:0009116 BP:nucleoside metabolic process;GO:0044206 BP:UMP salvage;GO:0044211 BP:CTP salvage;GO:1901141 BP:regulation of lignin biosynthetic process;GO:2000904 BP:regulation of starch metabolic process;GO:2001006 BP:regulation of cellulose biosynthetic process;GO:0004849 MF:uridine kinase activity;GO:0005524 MF:ATP binding;GO:00…
TraesCS5D02G292800	chr5D:390270736-390274567(-)	Ribulose-phosphate 3-epimerase, cytoplasmic isoform [UniProtKB/Swiss-Prot:Q9SE42]	Os09g0505700	Ribulose-phosphate 3-epimerase, cytoplasmic isoform	AT3G01850	Ribulose-phosphate 3-epimerase, cytoplasmic isoform [UniProtKB/Swiss-Prot:Q9SE42]	PF00834:Ribulose-phosphate 3 epimerase family;PF00834:Ribulose-phosphate 3 epimerase family;	GO:0009052 BP:pentose-phosphate shunt, non-oxidative branch;GO:0019323 BP:pentose catabolic process;GO:0044262 BP:cellular carbohydrate metabolic process;GO:0004750 MF:ribulose-phosphate 3-epimerase activity;GO:0046872 MF:metal ion binding;GO:0005829 CC:cytosol;
TraesCS5D02G292900	chr5D:390360050-390363744(-)	Proteasome subunit beta type-1 [UniProtKB/Swiss-Prot:O64464]	Os09g0505600	Proteasome subunit beta type-1	AT3G60820	Proteasome subunit beta type-1 [UniProtKB/Swiss-Prot:P42742]	PF00227:Proteasome subunit;	GO:0010498 BP:proteasomal protein catabolic process;GO:0010499 BP:proteasomal ubiquitin-independent protein catabolic process;GO:0043161 BP:proteasome-mediated ubiquitin-dependent protein catabolic process;GO:0004175 MF:endopeptidase activity;GO:0004298 MF:threonine-type endopeptidase activity;GO:0005634 CC:nucleus;GO:0005737 CC:cytoplasm;GO:0005839 CC:proteasome core complex;GO:0019774 CC:protea…
TraesCS5D02G293000	chr5D:390371485-390374192(+)	Probable auxin efflux carrier component 5c	Os08g0529000	Auxin efflux carrier PIN5B	AT5G16530	Encodes PIN5	PF03547:embrane transport protein;PF03547:embrane transport protein;PF03547:embrane transport protein;	GO:0009734 BP:auxin-activated signaling pathway;GO:0009926 BP:auxin polar transport;GO:0010252 BP:auxin homeostasis;GO:0010315 BP:auxin efflux;GO:0010329 MF:auxin efflux transmembrane transporter activity;GO:0005783 CC:endoplasmic reticulum;GO:0005886 CC:plasma membrane;GO:0016021 CC:integral component of membrane;
TraesCS5D02G293100	chr5D:390417742-390421987(+)	Probable auxin efflux carrier component 5c	Os08g0529000	Auxin efflux carrier PIN5B	AT5G16530		PF03547:embrane transport protein;PF03547:embrane transport protein;PF03547:embrane transport protein;	GO:0009734 BP:auxin-activated signaling pathway;GO:0009926 BP:auxin polar transport;GO:0010252 BP:auxin homeostasis;GO:0010315 BP:auxin efflux;GO:0010329 MF:auxin efflux transmembrane transporter activity;GO:0005783 CC:endoplasmic reticulum;GO:0005886 CC:plasma membrane;GO:0016021 CC:integral component of membrane;
TraesCS5D02G293200	chr5D:390451315-390453099(-)	Uncharacterized membrane protein YjcL [UniProtKB/Swiss-Prot:O31634]	NA		AT5G52540	Uncharacterized membrane protein YjcL [UniProtKB/Swiss-Prot:O31634]	PF05684:Protein of unknown function (DUF819);	GO:0005886 CC:plasma membrane;GO:0016021 CC:integral component of membrane;
TraesCS5D02G293300	chr5D:390504143-390506578(+)	Probable auxin efflux carrier component 5c	Os08g0529000	Auxin efflux carrier PIN5B	NA		PF03547:embrane transport protein;	GO:0009734 BP:auxin-activated signaling pathway;GO:0009926 BP:auxin polar transport;GO:0010252 BP:auxin homeostasis;GO:0010315 BP:auxin efflux;GO:0010329 MF:auxin efflux transmembrane transporter activity;GO:0005783 CC:endoplasmic reticulum;GO:0005886 CC:plasma membrane;GO:0016021 CC:integral component of membrane;
TraesCS5D02G293400	chr5D:390506981-390509985(+)	Probable inactive purple acid phosphatase 27	Os09g0505900	Probable inactive purple acid phosphatase 27	AT5G50400	Probable inactive purple acid phosphatase 27	PF00149:Calcineurin-like phosphoesterase;PF14008:Iron/zinc purple acid phosphatase-like protein C;PF16656:"Purple acid Phosphatase, N-terminal domain";PF17808:Fn3-like domain from Purple Acid Phosphatase;	GO:0003993 MF:acid phosphatase activity;GO:0046872 MF:metal ion binding;GO:0005576 CC:extracellular region;
TraesCS5D02G293500	chr5D:390548467-390550495(-)	Probable inactive purple acid phosphatase 27	Os09g0506000	Probable inactive purple acid phosphatase 27	AT5G50400	Probable inactive purple acid phosphatase 27	PF00149:Calcineurin-like phosphoesterase;PF14008:Iron/zinc purple acid phosphatase-like protein C;PF16656:"Purple acid Phosphatase, N-terminal domain";	GO:0003993 MF:acid phosphatase activity;GO:0046872 MF:metal ion binding;GO:0005576 CC:extracellular region;
TraesCS5D02G293600	chr5D:390558313-390559450(+)	Probable inactive purple acid phosphatase 27	Os09g0505900	Probable inactive purple acid phosphatase 27	AT5G50400	Probable inactive purple acid phosphatase 27	PF00149:Calcineurin-like phosphoesterase;PF14008:Iron/zinc purple acid phosphatase-like protein C;	GO:0003993 MF:acid phosphatase activity;GO:0046872 MF:metal ion binding;GO:0005576 CC:extracellular region;
TraesCS5D02G293700	chr5D:390562929-390567192(+)	Probable inactive purple acid phosphatase 27	Os09g0506000	Probable inactive purple acid phosphatase 27	AT5G50400	Probable inactive purple acid phosphatase 27	PF00149:Calcineurin-like phosphoesterase;PF14008:Iron/zinc purple acid phosphatase-like protein C;PF16656:"Purple acid Phosphatase, N-terminal domain";PF17808:Fn3-like domain from Purple Acid Phosphatase;PF00149:Calcineurin-like phosphoesterase;PF14008:Iron/zinc purple acid phosphatase-like protein C;PF16656:"Purple acid Phosphatase, N-terminal domain";PF17808:Fn3-like domain from Purple Acid Pho…	GO:0003993 MF:acid phosphatase activity;GO:0046872 MF:metal ion binding;GO:0005576 CC:extracellular region;
TraesCS5D02G293800	chr5D:390570531-390573249(-)	Fructokinase-1 [UniProtKB/Swiss-Prot:Q0JGZ6]	Os01g0894300	Fructokinase-1	AT2G31390	Probable fructokinase-1 [UniProtKB/Swiss-Prot:Q9SID0]	PF00294:pfkB family carbohydrate kinase;	GO:0006000 BP:fructose metabolic process;GO:0019252 BP:starch biosynthetic process;GO:0005524 MF:ATP binding;GO:0008865 MF:fructokinase activity;GO:0019200 MF:carbohydrate kinase activity;GO:0005829 CC:cytosol;
TraesCS5D02G293900	chr5D:390692438-390696550(+)	NA	Os09g0502800	OsFBX334 - F-box domain containing protein	NA
TraesCS5D02G294000	chr5D:390704238-390708633(+)	NA	Os09g0502600		NA

## Sheet: Table S5
Table S5. Expression profile of 39 high confidence genes based on the wheat expression atlas
Tissue	TraesCS5D02G286000		TraesCS5D02G286100	TraesCS5D02G286100	TraesCS5D02G286200	TraesCS5D02G286200	TraesCS5D02G286300	TraesCS5D02G286300	TraesCS5D02G286400	TraesCS5D02G286400	TraesCS5D02G286500	TraesCS5D02G286500	TraesCS5D02G286600	TraesCS5D02G286600	TraesCS5D02G286700	TraesCS5D02G286700	TraesCS5D02G286800	TraesCS5D02G286800	TraesCS5D02G287800	TraesCS5D02G287800	TraesCS5D02G288000	TraesCS5D02G288000	TraesCS5D02G288100	TraesCS5D02G288100	TraesCS5D02G288500	TraesCS5D02G288500	TraesCS5D02G287700	TraesCS5D02G287700	TraesCS5D02G288800	TraesCS5D02G288800	TraesCS5D02G288900	TraesCS5D02G288900	TraesCS5D02G289000	TraesCS5D02G289000	TraesCS5D02G289200	TraesCS5D02G289200	TraesCS5D02G289300	TraesCS5D02G289300	TraesCS5D02G289400	TraesCS5D02G289400	TraesCS5D02G289500	TraesCS5D02G289500	TraesCS5D02G289900	TraesCS5D02G289900	TraesCS5D02G290800	TraesCS5D02G290800	TraesCS5D02G291200	TraesCS5D02G291200	TraesCS5D02G291500
	tpm	SEM	tpm	SEM	tpm	SEM	tpm	SEM	tpm	SEM	tpm	SEM	tpm	SEM	tpm	SEM	tpm	SEM	tpm	SEM	tpm	SEM	tpm	SEM	tpm	SEM	tpm	SEM	tpm	SEM	tpm	SEM	tpm	SEM	tpm	SEM	tpm	SEM	tpm	SEM	tpm	SEM	tpm	SEM	tpm	SEM	tpm	SEM	tpm
radicle	0.337528	0	0.427307	0	7.35087	4.76325	5.12339	2.7016	6.52795	4.29313	6.54317	3.82075	2.54909	0.353701	2.01083	0	1.3772	0	3.92256	1.83203	2.98186	0	4.39353	1.68293	0.997981	0	0.405137	0	1.65492	0	6.11235	5.35356	5.74031	4.64442	5.43597	3.54475	3.23448	0	2.53628	0	2.23641	0	0.897878	0	1.77672	0	0	0	1.97471
coleoptile	0	0	0	0	5.42909	5.65387	4.0403	1.73259	4.75497	4.61294	5.31593	4.39591	1.08137	0.571092	2.80053	0.0692293	0	0	5.9966	3.74728	2.30431	0.489549	2.68515	1.81917	0.295816	0	1.94504	0	0	0	1.11314	2.69962	0	0	0	0	3.1384	0.333867	2.6595	0	0.469787	0	1.59604	0	0.666073	0	0	0	0.760547
stem axis	0	0	0	0	6.81708	4.94639	4.01734	2.4485	6.33222	4.15264	5.90702	4.13798	2.01437	1.02597	1.98654	0.840051	0	0	5.91861	4.24001	2.16457	0.642781	3.35273	1.50836	0.0905274	0	1.46149	0	0	0	0	0	0	0	0	0	2.81754	0	2.16206	0.486859	0.860357	0.51662	1.02013	0	0.768285	0	0	0	1.3099
first leaf sheath	0	0	0	0	6.12347	5.64376	4.25088	2.71875	5.33404	4.9355	5.80477	3.84248	0.813979	1.12405	2.56728	0.578023	0.216643	0	5.14322	5.13968	3.0847	1.6774	3.2696	1.78925	1.22044	0	1.11489	0.734255	0	0.390298	9.02125	9.6151	4.17036	4.71005	0	0	3.07387	0.289702	3.03176	1.48643	1.0727	0.298581	0.941889	0	1.42863	0.0591417	0	0	1.42907
first leaf blade	0	0	0	0	5.05837	4.04858	4.06508	2.90586	4.38789	3.66238	5.30884	4.06882	0	0	2.77518	0.979972	0	0	3.51463	3.92714	2.99099	1.81174	2.55597	0.867241	0.842638	0	1.25144	0	0	0	0	0	0	0	0	0	3.16221	1.65945	2.97429	1.67255	0.276302	0	1.33098	0	0.658868	0	0	0	1.41385
roots	0.870143	0.84611	0	0	7.31176	6.34423	4.5604	3.51269	6.19186	5.25981	6.01613	4.71853	2.42972	1.41982	1.8211	0.976474	0.702965	0.0951157	4.59287	3.89539	2.97516	2.24776	4.35897	2.96638	0.377389	0.241102	0	0	0.292501	0.730545	5.64457	5.88222	6.22858	6.42863	5.10755	4.66467	2.57775	1.63879	2.73627	1.73551	1.62008	0.577202	0.894501	0.0316255	1.60199	0.414298	1.50287	0.933249	1.50299
shoot apical meristem	0	0	0	0	8.08949	4.81791	3.72209	2.27198	7.15893	4.89936	6.55372	3.39474	3.37076	1.67719	2.10654	0	0	0	5.01318	3.3636	2.75038	0.49451	5.00841	1.61919	1.39998	0	0	0	0	0	3.50331	3.67015	2.17684	2.09556	4.5761	4.65854	2.71651	0	2.7869	0.0404152	2.22115	0	0.417252	0	2.03752	0	0	0	2.05051
third leaf blade	0	0	0	0	5.2659	5.73191	3.74827	1.26265	4.70798	5.22998	4.6965	4.46122	0.372143	1.10783	2.16435	0.210153	0	0	4.74667	5.50262	1.67511	0	2.51001	2.3346	0	0	1.29133	0	0	0	0	0	0	0	0	0	2.51696	0.294965	1.96318	0.0556813	0	0	0.676558	0	0	0	0	0	0.294737
third leaf sheath	0	0	0	0	8.18206	6.11367	2.31029	1.57289	7.36037	5.22495	6.81748	1.03073	2.69813	0.451435	1.81546	0	0	0	6.03605	4.23673	1.99394	0	4.75552	2.07798	0.727273	0	0.169256	0	0	0	0.109258	0.901739	0	0	0.950703	1.33814	3.03214	0	2.10006	0	1.66667	0	0.788844	0	1.58591	0	0	0	2.09724
root apical meristem	1.68392	0.367836	1.44648	0.0302426	8.21475	5.07775	4.6509	2.94665	7.18837	4.10071	6.63067	3.40389	2.64278	0	0.568258	0.0221489	0.999543	0	4.35685	2.87165	2.71857	1.3004	5.08906	2.79444	0.83188	0	0	0	0	0	2.3938	2.39183	6.32294	4.51522	6.38414	4.53486	3.00188	0.0493837	2.19558	0	2.69652	0	0.221937	0	1.66422	0	0	0	1.85422
axillary roots	0.849645	1.06563	0.838171	1.05172	7.28064	5.9048	4.85733	1.89749	6.4635	5.15697	6.37432	3.19893	2.68693	0	2.08697	0	1.46867	0	3.68749	2.39776	3.07428	0.780598	4.31101	2.62346	1.14539	0	0.651708	0	0.761719	0	5.63978	5.21762	5.19704	4.28978	4.77092	4.88847	3.30423	0.00299932	2.5324	0.0347889	2.33243	0.0494116	0.920989	0	1.5862	0	0	0	1.86266
fifth leaf sheath	0	0	0	0	7.21074	6.98146	3.5978	3.30374	6.38687	6.11527	6.19891	5.21947	2.51858	1.80343	1.98853	0	0	0	5.93183	5.00777	2.26707	0.0890721	3.97939	3.53345	1.01101	0	2.05853	1.49099	0	0	0	0	0	0	0	0	3.08249	0.272774	2.21136	0	1.25637	0.53608	0.773082	0	1.35177	0.010324	0	0	1.69589
fifth leaf blade	0	0	0	0	5.23002	5.82197	3.54573	2.19111	4.56919	5.28859	5.29335	4.75876	0	0.60795	2.41336	1.0256	0	0	2.83109	4.08083	2.54931	1.56761	2.39327	2.36116	0.434248	0	1.61324	0	0	0	0	0	0	0	0	0	2.97913	1.21631	2.49535	1.2245	0	0	0.716938	0	0.082343	0	0	0	0.900839
shoot axis	0	0	0	0	7.68987	6.24967	3.9387	1.9155	6.64936	5.35528	6.51904	4.05856	3.02434	1.89927	2.08031	0.322134	0	0	4.52489	3.87114	3.04904	0.765359	4.50797	2.78911	1.538	0	0	0	0	0	5.00978	5.35208	3.07966	2.7993	4.95701	4.82256	2.7676	0	3.09364	1.29294	2.25469	1.04325	0.949818	0	2.10538	0	0	0	1.93149
flag leaf blade	0	0	0	0	4.58613	2.9399	3.04684	1.86157	3.90587	2.33991	5.73589	4.13568	0	0	2.69269	0.596871	0	0	0	1.02318	2.77409	0.877014	2.61935	1.13269	0.507101	0	1.47464	0	0	0	0.692342	0.878583	0	0	0	0	3.27573	1.11039	2.86432	0.677805	0	0	1.36785	0	0.36975	0	0	0	1.18766
flag leaf blade night (-0.25h) 06:45	0	0	0	0	4.65907	4.10134	3.36921	2.29164	3.93395	3.36923	5.05482	4.1226	0	0	3.12139	1.84256	0	0	1.49023	1.84396	3.02613	2.1832	2.23277	1.02198	0.0939831	0	0.407494	0	0	0	0	0	0	0	0	0	3.38378	1.48159	3.36546	2.13658	0.725552	0.630212	0.392623	0	0	0	0	0	0.31549
fifth leaf blade night (-0.25h) 21:45	0	0	0	0	5.03288	4.08709	3.54771	1.492	4.53853	3.64846	5.51177	4.54505	0	0	3.0973	0.75951	0	0	1.1748	1.19038	2.26047	0.990474	2.5743	1.39879	0	0	1.24117	0	0	0	0	0	0	0	0	0	3.11874	1.10052	2.18032	0	0.782605	0.0843762	1.48814	0	0.130852	0	0	0	0.560567
flag leaf blade night (+0.25h)07:15	0	0	0	0	4.00563	1.48846	3.92131	0.414208	3.7412	0.638222	4.30614	0.464209	0	0	2.16765	0	0	0	3.74358	2.43231	1.78496	0	1.88151	0	0	0	1.46571	0	0	0	0	0	0	0	0	0	3.00234	0	2.61823	0	0	0	0	0	0	0	0	0	0
fifth leaf blade night (+0.25h) 22:15	0	0	0	0	3.88165	2.67034	3.62812	1.36803	3.26456	2.60255	4.50081	2.00609	0	0	2.6407	0	0	0	1.99067	0.981807	1.56604	0	1.88253	0.489668	0.0368685	0	1.6393	0.495273	0	0	0	0	0	0	0	0	2.83377	0.242003	1.91865	0	0	0	0.794819	0	0	0	0	0	0.314928
leaf ligule	0	0	0	0	4.66248	2.87942	4.35337	0	4.09382	0.407306	5.60151	2.25289	0	0	3.12589	0	0	0	4.72421	2.44908	2.99265	0.239079	2.38251	0	1.29281	0	2.50797	0.0387024	0	0	4.01723	0.0104773	0	0	0	0	3.33915	0	3.02526	0	0	0	1.62895	0	1.13742	0	0	0	1.31409
flag leaf sheath	0	0	0	0	5.06443	3.7608	2.69814	1.41807	4.41814	3.14916	6.17731	5.06144	0	0	2.73842	0.649451	0	0	0	0.190557	3.08024	1.42226	2.60504	0.497468	0.84758	0	1.48887	0.309529	0	0	0	0	0	0	0	0	3.4819	0.82696	2.67378	0.351976	0.257312	0	1.26675	0	0.742864	0	0	0	1.0995
spike	0	0	0	0	6.92696	5.28178	3.09008	2.47178	5.63018	3.92831	5.94042	3.68626	2.9864	1.74655	2.18878	0.907852	0	0	4.866	4.1236	1.66496	0.837009	4.07476	1.88435	0.333449	0	1.86146	0.736609	0	0	0	0	0	0	0	0	2.65746	0.626911	1.77855	0.683054	1.0403	0	0.0848646	0	1.79109	0.0872916	0	0	1.25312
Internode #2	0	0	0	0	6.00736	4.11684	3.12862	1.41085	4.91291	2.97142	5.57307	2.89935	0	0	2.86407	0.947525	0	0	1.35248	0.478194	3.34783	1.35462	3.19066	1.20478	1.55348	0.0469841	1.7508	1.20777	0	0	0	0	0	0	0	0	3.15065	0.583892	3.0246	1.14834	0.57515	0	1.0997	0	1.42028	0	0	0	1.24035
peduncle	0	0	0	0	5.57277	3.90179	4.30299	2.22143	5.00093	2.08775	5.11062	4.36539	1.6308	1.23983	1.91885	0.886246	0	0	4.56037	4.74621	2.40364	0.323621	2.68675	0.62787	0.666521	0	2.36813	1.53446	0	0	0	0	0	0	0	0	3.05319	1.89626	2.45458	1.1433	0	0	1.08088	0	0.490857	0	0	0	1.17099
spikelets	0	0	0	0	6.63453	4.10136	4.04379	1.99772	5.88129	3.2778	6.60956	4.33805	2.35238	0.349996	2.41697	0	0.463214	0	5.02281	3.36127	2.93607	0.149081	4.01888	1.26956	1.04769	0	2.31424	0.564222	0	0	1.30345	1.45488	1.07555	0.917747	0	0	2.98604	0	2.68979	0	1.46443	0	1.67328	0	1.74111	0	0	0	2.01624
awns	0	0	0	0	5.04151	3.52025	3.25647	0.666222	4.28199	2.4132	5.71608	4.59073	0	0	2.59085	0.85956	0	0	1.15631	0.404624	2.59882	0.924162	2.35569	0.0498088	0.623304	0	2.18018	0.620356	0	0	0.248549	0	0	0	0	0	3.05774	1.01381	2.57547	0.818927	0.450484	0	0.894593	0	0.691914	0	0	0	1.18782
glumes	0	0	0	0	5.38188	3.04329	3.96918	1.49634	4.60404	2.27954	5.79048	3.63823	0	0	2.73703	0	0	0	0	0	3.0315	0	2.66616	0	1.30821	0.648878	2.36225	1.48649	0	0	0	0	0	0	0	0	3.45065	0	2.75623	0.221111	0.349258	0	1.2383	0	1.24445	0	0	0	1.30056
lemma	0	0	0	0	5.26952	2.79858	3.95497	2.00698	4.49572	1.70229	5.98341	3.50152	0	0	2.86919	0	0	0	0	0	3.01002	0	2.58711	0.565819	1.09567	0	1.87521	0.615176	0	0	0	0	0	0	0	0	3.50989	0	2.80253	0	0.780413	0	0.879472	0	1.27866	0	0	0	1.41103
anther	0	0	0	0	6.14318	5.49405	1.75341	0.20659	5.44241	4.88592	6.08577	3.58186	1.68401	0.914323	1.0378	0.750965	0	0	2.47989	2.23212	1.87962	1.06887	3.21577	1.77051	0.451813	0.429049	0.963012	0.512659	0	0	2.02376	2.27212	0	0	0	0	2.57111	1.46398	2.43719	1.1119	1.14879	0	0.338843	0	0.533093	0	0	0	1.03035
stigma & ovary	0	0	0	0	6.92521	0.589479	4.25184	0.359019	6.36098	1.78505	6.78847	2.83197	3.92134	0.832499	2.59606	0.253601	1.36003	0	5.13282	3.58407	3.12385	0	4.01152	0.564734	1.00792	0	1.21196	0	0	0	0	0	0	0	0	0	3.32681	0	2.66518	0.0950558	2.32307	0	1.71569	0	2.4211	0	0	0	2.42344
fifth leaf blade (senescence)	0	0	0	0	5.26761	2.34515	2.9555	0.0191166	4.59299	1.86216	6.17387	4.0432	0	0	3.17282	0	0.842032	0	0	0	3.38785	0.409441	2.51967	0	0.887788	0	0.470228	0	0	0	0.498642	1.29112	0	0	0	0	3.75493	0.851424	2.54241	0.118474	0.541083	0	1.62881	0	0.901229	0	0	0	1.44533
grain	0	0	0	0	5.53363	4.40674	2.1706	1.47859	4.76157	3.90211	5.73236	4.38536	1.65373	0.227002	0.573429	0.0747942	0	0	2.4801	3.36026	1.60537	0.985644	3.44209	2.25043	0	0	0.905903	0.169527	0	0	0	0	0	0	0	0	2.18332	0.580704	1.87274	1.6922	0.780984	0.0654008	0.15465	0	1.38855	0	0	0	1.29728
flag leaf blade (senescence)	0	0	0	0	5.29637	2.8628	2.85807	1.24962	4.66117	1.69412	5.88443	2.34233	0	0	3.02323	0.411142	0.622556	0	0	0	3.23007	0	2.77548	0	1.18611	0	1.51063	0	0	0	0	0.174285	0	0	0	0	3.45157	0.958582	2.79973	0	0.248392	0	1.67727	0	0.943159	0	0	0	1.74375
endosperm	0	0	0	0	4.62855	1.01996	1.11195	0	4.42542	0.787337	5.41427	3.09445	0	0	0	0	0	0	1.26351	0.246354	1.54283	0	3.00924	0.696659	0.379873	0	0.364049	0	0	0	0	0	0	0	0	0	1.473	0	0.891879	0	0	0	0.117891	0	1.25022	0	0	0	1.2083
embryo proper	0	0	0	0	7.04944	4.01792	2.12436	0	6.69768	2.94317	6.78742	3.21694	3.11832	0	2.7482	0	0	0	2.84496	0.827759	3.51921	0	4.75926	1.48158	1.94557	0.154003	0.774233	0	0	0	0	0	0	0	0	0	1.81506	0.103449	3.39755	1.36463	3.00003	0.688064	1.22851	0	2.49721	0	0	0	2.72105
leaf	0	0	0	0	4.88477	4.64219	3.6381	3.31711	3.86227	3.63042	5.13003	4.00951	0	0	2.29729	1.75117	0	0	3.03996	3.71076	2.4101	1.6609	2.82804	1.87694	0.114873	0	2.16918	1.59429	0	0	2.77372	4.72537	3.39998	5.13618	0	0	2.62974	1.05414	2.78563	1.73901	0.0133227	0	0.791898	0.25691	0.25203	0	0	0	0.943309
spike (top third)	0	0	0	0	6.50659	0	4.48189	0	5.62135	0	6.45896	0	2.16461	0	2.71497	0	0	0	4.17149	0	2.6459	0	3.80588	0	0.860756	0	2.85	0	0	0	1.51508	0	0	0	0	0	2.75064	0	2.77299	0	1.38965	0	1.6922	0	1.62031	0	0	0	1.27082
spike (middle third)	0	0	0	0	6.56476	0	4.20528	0	5.79834	0	6.48059	0	2.23417	0	2.519	0	0	0	4.33336	0	2.57939	0	4.22131	0	0.386745	0	2.53682	0	0	0	0.518052	0	0	0	0	0	3.04434	0	2.92302	0	1.69571	0	1.53003	0	1.61917	0	0	0	1.78185
spike (bottom third)	0	0	0	0	6.12253	0	4.45068	0	5.29861	0	6.16355	0	2.32175	0	2.75039	0	0	0	4.19795	0	2.77702	0	3.69757	0	0.999271	0	2.83937	0	0	0	0.388873	0	0	0	0	0	2.8806	0	2.84653	0	1.3057	0	1.34507	0	1.64515	0	0	0	1.50311
fourth leaf	0	0	0	0	6.32143	5.35568	3.49124	1.37057	5.10668	4.02989	5.26393	1.97873	0.12955	0	2.33824	1.13663	0	0	4.6973	3.9759	2.04721	0	3.63813	2.24035	0.305504	0	2.10694	0	0	0	3.75982	3.34254	0	0	0	0	2.26411	1.94333	2.74952	0.968391	0.715385	0	1.03132	0	0.152722	0	0	0	1.27183
whole endosperm	0	0	0	0	5.27057	4.69299	0	0	5.25389	4.99307	5.28836	4.4125	0	0	0	0	0	0	1.14537	1.12803	0.424833	0	2.90175	2.03738	0	0	0.458281	0	0	0	0	0	0	0	0	0	0.75119	0	0	0	0	0	0	0	0.338644	0	0	0	0.162599
starchy endosperm	0	0	0	0	4.46503	4.03322	0	0	4.05461	3.82124	4.88263	5.34915	0	0	0	0	0	0	0	0	0.21935	0	2.40527	2.23536	0.219222	0.635099	0.701533	1.33289	0	0	0	0	0	0	0	0	1.2771	1.29715	0.0186077	0.401647	0	0.0511859	0	0	0	0	0	0	0
aleurone layer	0	0	0	0	5.30463	4.18562	2.45251	2.42736	4.8474	3.14808	6.3837	4.0289	0	0	1.48487	2.51305	0	0	3.91106	3.73827	1.91474	0.458834	3.73249	1.74359	0.112715	0	3.99464	4.01472	0	0	0	0	0	0	0	0	2.74587	2.39991	1.82112	1.19161	0.0597474	0	0	0	1.21153	0	0	0	0.653518
seed coat	0	0	0	0	5.68064	4.24635	4.40976	3.45139	4.8203	2.93838	6.12554	4.31963	0.337274	0	1.26801	1.27416	0	0	5.87281	5.27429	1.56769	0	3.62293	2.66841	0.47842	0.243931	2.04878	1.02822	0	0	0	0.624698	0	0	0	0	2.36097	1.05265	2.54912	0.334285	0.200832	0	1.08571	0	1.13662	0.359613	0	0	0.385282
flag leaf	0	0	0	0	4.81379	2.80038	3.12911	2.03431	4.16879	2.2519	5.28982	2.3864	0	0	2.90951	1.31092	0	0	0	0	2.08714	0	2.72838	0.812302	0.0474347	0	2.23139	0.732657	0	0	3.06394	3.39113	0	0	0	0	2.72511	1.86133	2.2862	0	0.474024	0	1.30852	0.38978	0	0	0	0	0.881597
shoots	0	0	0	0	6.41876	6.25456	3.54742	2.52824	5.40526	5.24598	5.27758	4.64352	0.795199	0.844561	2.43849	1.11799	0	0	4.55543	4.34701	1.96113	0.82153	3.49977	3.03419	0.0532484	0	1.79749	1.18991	0.273514	0.656341	4.10725	5.58416	0.414127	1.20069	0.811088	1.48691	2.48705	1.56281	2.34256	0.998591	0.580165	0.227601	0.6341	0	0.373162	0	0	0	0.753521
second leaf	0	0	0	0	5.47839	5.23869	2.81004	2.12558	3.9661	3.67428	5.12158	4.26925	0	0	2.87169	2.12214	0	0	0	0.0347364	1.77311	0.617399	3.06364	1.7957	0.0627647	0	1.25983	0.6735	0	0	6.80241	8.37601	0	0	0	0	2.2514	1.27768	2.01896	0.843477	0	0	0.982596	0.239957	0	0	0	0	0.1692
spikelets (only using palea, lemma and rachis)	0	0	0	0	6.10655	3.59749	4.50305	2.42969	5.10995	3.05591	5.80197	2.66248	1.43375	0.804732	2.87118	0.20718	0	0	4.0259	3.57805	2.96092	0.355166	3.92949	1.3634	1.11752	0.109968	2.65225	1.50821	0	0	2.95849	3.69401	0.874621	1.03597	0	0	2.85271	0	2.81494	0	1.27087	0	1.67812	0	1.37931	0	0	0	1.79636
starchy endosperm + seed coat	0	0	0	0	5.57675	4.49751	2.5582	1.50704	5.46727	4.51694	6.96612	6.1289	1.0553	0	0	0	0	0	4.91204	4.42279	0.354438	0	2.7113	1.15166	0	0	0.513573	0	0	0	0	0	0	0	0	0	2.53251	0.932502	1.78745	0.340609	0.748329	0.64093	0.592423	0	0.829893	0	0	0	0.555656
stamen	0	0	0	0	6.14965	0	3.22289	0	5.36016	0	6.81719	0	1.49757	0	1.66552	0	0	0	4.82553	0	1.78689	0	4.49089	0	0	0	4.08336	0	0	0	0	0	0	0	0	0	2.69591	0	1.90455	0	1.23273	0	0.876982	0	1.58849	0	0	0	0.770454
pistillody stamen	0	0	0	0	6.67727	0	3.58283	0	6.25263	0	5.8765	0	3.848	0	2.34684	0	0	0	6.14226	0	2.58792	0	4.37405	0	0	0	3.88581	0	0	0	0	0	0	0	0	0	2.2945	0	2.332	0	2.06305	0	1.73467	0	2.48548	0	0	0	2.01005
pistil	0	0	0	0	6.93536	0	3.29522	0	6.41218	0	5.73067	0	3.62867	0	1.52443	0	0	0	6.06973	0	2.3507	0	4.75762	0	0	0	3.94938	0	0	0	0	0	0	0	0	0	2.26734	0	2.31637	0	1.8372	0	1.59881	0	2.27895	0	0	0	1.60501
stem	0	0	0	0	6.88746	6.54976	3.63072	1.87055	5.76314	5.23332	5.87256	4.28797	1.61487	1.77815	2.19856	0.742362	0	0	5.45104	5.4535	2.23518	0.745142	4.03867	3.56775	0.643097	0.149201	2.17509	1.80898	0	0	0.72523	1.09632	0	0	0.0952864	0.540272	2.69937	1.69362	2.78248	1.10706	0.875607	0.584649	0.838003	0	1.57861	0	0	0	1.40129
seedling	0.728661	0	1.07434	0	6.28478	1.55329	4.19825	2.75755	5.27284	3.24316	5.73488	4.36687	1.63603	1.29252	0.665376	0.933993	0	0	4.87144	2.83181	1.54002	0	3.67489	1.76398	0.238297	0	0	0	0	0	0.938552	1.73103	3.48279	2.0339	3.07237	3.37491	2.34528	1.84219	2.06602	1.13232	0.857155	0.0337408	0	0	0.806789	0	0.370195	0.234093	1.19381
rachis	0	0	0	0	4.93112	3.8949	2.78644	2.39456	4.53739	3.93232	5.09906	4.45142	0	0	2.803	2.41579	0	0	1.31827	1.52542	2.46968	0.00110509	3.23416	1.07987	0.597044	0.316234	0	0.200093	0	0	5.85986	5.99927	1.13789	1.54125	0	0	2.60083	1.74193	2.53521	0.340893	0.858136	0	1.69129	1.53586	1.4422	0.326239	0	0	1.48092
transfer cells	0	0	0	0	3.97641	2.26471	0.144877	0	3.52211	0.561222	4.51138	2.83792	0	0	0	0	0	0	0	0	1.15748	0	2.24812	0.89613	0	0	0	0	0	0	0	0	0	0	0	0	0.878942	0	0.419889	0	0	0	0.268939	0	1.1193	0	0	0	0.38133
aleurone layer and starchy endosperm	0	0	0	0	4.20764	3.13504	0	0	4.06483	2.69401	4.8752	4.00846	0	0	0	0	0	0	0.580128	0	0.878861	0	2.58109	1.86705	0	0	0.56754	0	0	0	0	0	0	0	0	0	0.692372	0	0.0956254	0	0	0	0	0	0	0	0	0	0.553063
[truncated: 29 more columns]

## Sheet: Table S6
Table S6. The orthologs of 39 genes in Arabidopsis and rice
IWGSC v1.1_ID	RICE_ID	Function_description_RICE	TAIR10_ID	Function_description_TAIR
TraesCS5D02G286000	Os09g0501100	Auxin-induced in root cultures protein 12	NA	NA
TraesCS5D02G286100	Os09g0501100	Auxin-induced in root cultures protein 12	NA	NA
TraesCS5D02G286200	Os09g0502000	60S ribosomal protein L32-1	AT4G18100	60S ribosomal protein L32-1
TraesCS5D02G286300	Os09g0501600	Transcription factor bHLH49	NA	NA
TraesCS5D02G286400	Os09g0502000	60S ribosomal protein L32-1	AT4G18100	60S ribosomal protein L32-1
TraesCS5D02G286500	Os09g0501850	Peptidyl-prolyl cis-trans isomerase FKBP15-1	AT3G25220	Peptidyl-prolyl cis-trans isomerase FKBP15-1
TraesCS5D02G286600	Os09g0502100	NA	NA	NA
TraesCS5D02G286700	Os09g0535100	E3 ubiquitin ligase BIG BROTHER-related	AT3G19910	E3 ubiquitin ligase BIG BROTHER-related
TraesCS5D02G286800	Os09g0480300	NA	NA	NA
TraesCS5D02G287800	Os09g0476800	Fasciclin-like arabinogalactan protein 2	NA	NA
TraesCS5D02G288000	Os11g0515500	Transport inhibitor response 1-like protein	AT3G26810	Protein AUXIN SIGNALING F-BOX 2
TraesCS5D02G288100	Os11g0516100	NA	AT5G55125	NA
TraesCS5D02G288500	Os09g0502600	NA	NA	NA
TraesCS5D02G288700	Os09g0504000	UDP-glucuronate 4-epimerase 6	AT3G23820	UDP-glucuronate 4-epimerase 6
TraesCS5D02G288800	Os06g0281300	Acetylserotonin O-methyltransferase 1	NA	NA
TraesCS5D02G288900	Os12g0437800	Subtilisin-chymotrypsin inhibitor-2A	NA	NA
TraesCS5D02G289000	Os12g0437800	Subtilisin-chymotrypsin inhibitor-2A	NA	NA
TraesCS5D02G289200	Os12g0437800	Subtilisin-chymotrypsin inhibitor-2A	NA	NA
TraesCS5D02G289300	Os09g0504400	Cyclin-C1-1	AT5G48640	Cyclin-C1-1
TraesCS5D02G289400	Os09g0504700	NA	NA	NA
TraesCS5D02G289500	Os09g0504800	NA	NA	NA
TraesCS5D02G289900	NA	NA	NA	NA
TraesCS5D02G290800	Os09g0504900	NA	NA	NA
TraesCS5D02G291200	Os09g0518200	Putative UDP-rhamnose:rhamnosyltransferase 1	NA	NA
TraesCS5D02G291500	Os09g0505100	Ubiquitin carboxyl-terminal hydrolase 2	NA	NA
TraesCS5D02G291700	Os09g0505300	Oleoyl-acyl carrier protein thioesterase 1, chloroplastic	AT3G25110	Oleoyl-acyl carrier protein thioesterase 1, chloroplastic
TraesCS5D02G291800	Os08g0529000	Probable auxin efflux carrier component 5b	AT5G16530	Auxin efflux carrier component 5
TraesCS5D02G292000	Os07g0485100	Beta-ureidopropionase	AT5G64370	Beta-ureidopropionase
TraesCS5D02G292100	Os03g0598200	Nucleolar protein 14	NA	NA
TraesCS5D02G292200	Os08g0533600	ACT domain-containing protein ACR4	AT1G69040	ACT domain-containing protein ACR4
TraesCS5D02G292600	NA	NA	NA	NA
TraesCS5D02G292700	Os09g0505800	Uridine kinase-like protein 2, chloroplastic	AT3G27190	Uridine kinase-like protein 2, chloroplastic
TraesCS5D02G292800	Os09g0505700	Ribulose-phosphate 3-epimerase, cytoplasmic isoform	AT3G01850	Ribulose-phosphate 3-epimerase, cytoplasmic isoform
TraesCS5D02G292900	Os09g0505600	Proteasome subunit beta type-1	AT3G60820	Proteasome subunit beta type-1
TraesCS5D02G293100	Os08g0529000	Probable auxin efflux carrier component 5c	AT5G16530	Auxin efflux carrier component 5
TraesCS5D02G293200	NA	Uncharacterized membrane protein YjcL	AT5G52540	Uncharacterized membrane protein YjcL
TraesCS5D02G293500	Os09g0506000	Probable inactive purple acid phosphatase 27	AT5G50400	Probable inactive purple acid phosphatase 27
TraesCS5D02G293700	Os09g0506000	Probable inactive purple acid phosphatase 27	AT5G50400	Probable inactive purple acid phosphatase 27
TraesCS5D02G293800	Os01g0894300	Fructokinase-1	AT2G31390	Probable fructokinase-1

## Sheet: Table S7
Table S7. Sequence variation analysis of the candidate genes
Gene-ID	Start-End	Region of the gene	Position on reference	TAA10	XX329	Protein variants(TAA10/XX329)
TraesCS5D02G286000	386512857-386514008(+)	Upstream region of translation start codon	386512110	G	A	-
		Downstream region of the termination codon	386514673	G	A	-
TraesCS5D02G286100	386589437-386590714(+)	Upstream region of translation start codon	386587588	CCCACA	C	-
		Downstream region of the termination codon	386587594	C	CTGAGG	-
TraesCS5D02G288000	387619840-387626150(-)	Exon	387620308	T	A	Asn/Ile
		Upstream region of translation start codon	387631076	G	C	-
		Upstream region of translation start codon	387631097	G	A	-
		Upstream region of translation start codon	387631108	G	A	-
		Upstream region of translation start codon	387631111	G	T	-
		Upstream region of translation start codon	387631136	T	C	-
TraesCS5D02G291800	389457730-389461666(-)	Downstream region of the termination codon	389455828	T	C	-
		Downstream region of the termination codon	389455970	A	G	-
		Downstream region of the termination codon	389456005	C	CGTG	-
		Downstream region of the termination codon	389456023	G	A	-
		Downstream region of the termination codon	389456071	G	A	-
		Downstream region of the termination codon	389456310	A	T	-
		Downstream region of the termination codon	389456324	T	TA	-
		Downstream region of the termination codon	389456370	G	GA	-
		Downstream region of the termination codon	389456409	AT	A	-
		Downstream region of the termination codon	389456500	C	A	-
		Downstream region of the termination codon	389456522	A	AT	-
		Downstream region of the termination codon	389456594	T	G	-
		Downstream region of the termination codon	389456658	T	C	-
		Downstream region of the termination codon	389456716	CA	C	-
		Downstream region of the termination codon	389456741	GT	G	-
		Downstream region of the termination codon	389456811	TA	T	-
		Downstream region of the termination codon	389456820	CA	C	-
		Downstream region of the termination codon	389456944	G	A	-
		Downstream region of the termination codon	389457021	C	A	-
		Downstream region of the termination codon	389457034	A	T	-
		Downstream region of the termination codon	389457134	C	CG	-
		Downstream region of the termination codon	389457140	C	T	-
		Downstream region of the termination codon	389457222	C	T	-
		Downstream region of the termination codon	389457229	ACTCACCGTCAGGATCATGGTCACTCG	A	-
		Intron	389459318	T	C	-
		Upstream region of translation start codon	389462332	C	T	-
		Upstream region of translation start codon	389463158	G	A	-
		Upstream region of translation start codon	389463661	A	G	-
TraesCS5D02G293100	390417742-390421987(+)	Upstream region of translation start codon	390416034	T	C	-
		Upstream region of translation start codon	390416337	AG	A	-
		Upstream region of translation start codon	390416528	A	G	-
		Upstream region of translation start codon	390417120	C	T	-
		Upstream region of translation start codon	390417199	A	G	-
		Upstream region of translation start codon	390417522	C	T	-
		Upstream region of translation start codon	390417558	C	G	-
		Exon	390418107	T	G	Val/Gly
		Exon	390418155	T	C	Leu/Pro
		Exon	390418204	C	T	-
		Intron	390418867	CCT	C	-
		Intron	390418883	A	ATCAGATATATATAGACACGTTTCAGTGTAT	-
		Intron	390420617	T	C	-
		Intron	390420629	C	G	-
		Intron	390420788	C	T	-
		Intron	390420870	G	A	-
		Exon	390421319	G	C	Val/Leu
		Intron	390421575	A	T	-
		Downstream region of the termination codon	390422042	T	C	-
		Downstream region of the termination codon	390422262	C	T	-
